# Supplementary material for: An Assessment of the Validity and Reliability of the Pediatric Child Health Utility 9D in Children with Inflammatory Bowel Disease
Source: MDPI journal article supplement (doi:10.3390/children8050343), 2021-04-27
Supplement: s1 [file s1]

Supplementary Materials:

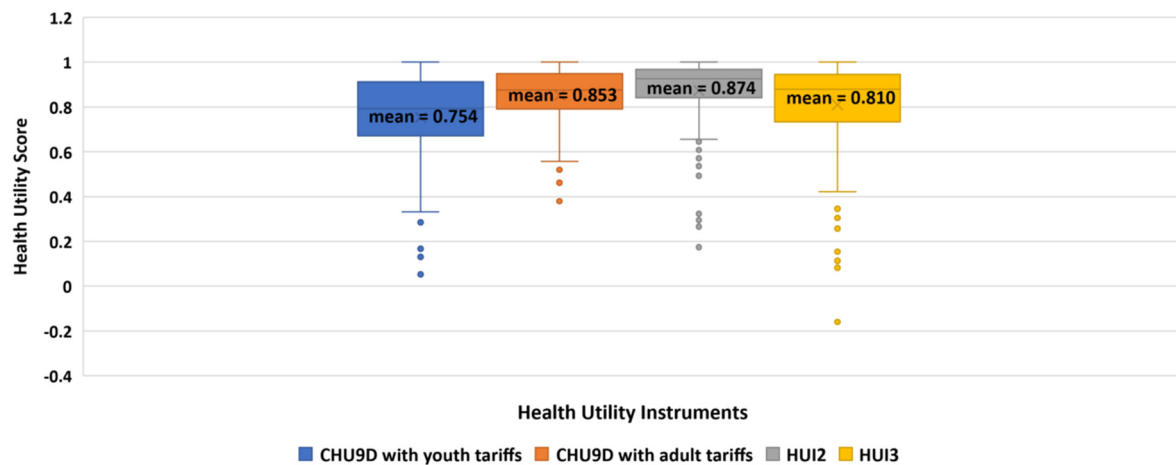

**Figure S1.** Box plot of utilities from the Child Health Utility 9D (CHU9D), Health Utility Index Mark 2 (HUI2) and Health Utility Index Mark 3 (HUI3) health utility instruments in children with Crohn's disease.

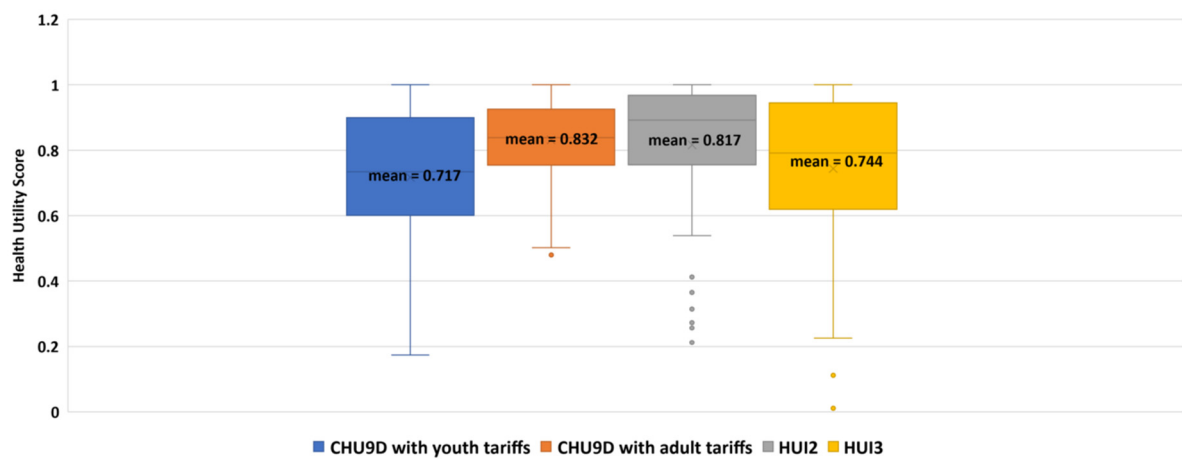

**Figure S2.** Box plot of utilities from the Child Health Utility 9D (CHU9D), Health Utility Index Mark 2 (HUI2) and Health Utility Index Mark 3 (HUI3) health utility instruments in children with ulcerative colitis.
